# Supplementary material for: Estimated effectiveness of traveller screening to prevent international spread of 2019 novel coronavirus (2019-nCoV)
Source: PubMed Central journal article supplement — medRxiv. 2020 Feb 3:2020.01.28.20019224. Preprint. [Version 2] doi: 10.1101/2020.01.28.20019224 (PMC7216848; doi:10.1101/2020.01.28.20019224), 2020-02-03
Supplement: NIHPP2020.01.28.20019224-supplement-1.pdf [file NIHPP2020.01.28.20019224-supplement-1.pdf]

509 **Supplementary Figures**  
510

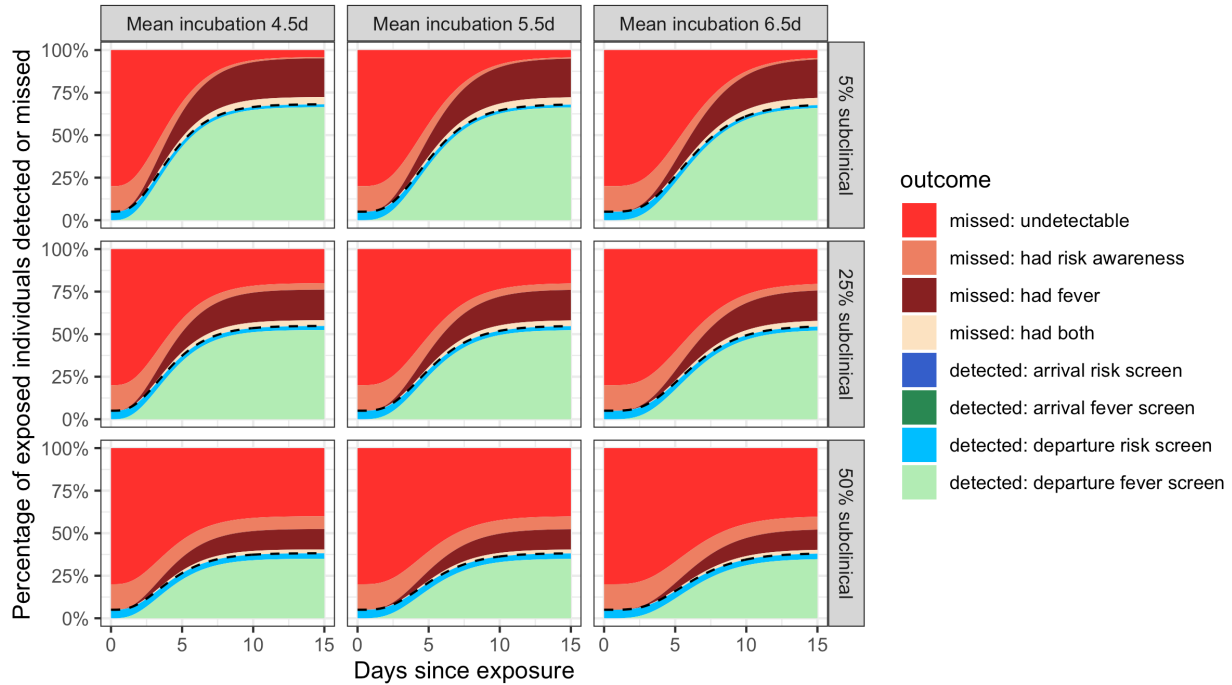

511  
512 Fig 2-Supplementary figure 1. Departure screening only.

513  
514  
515  
516

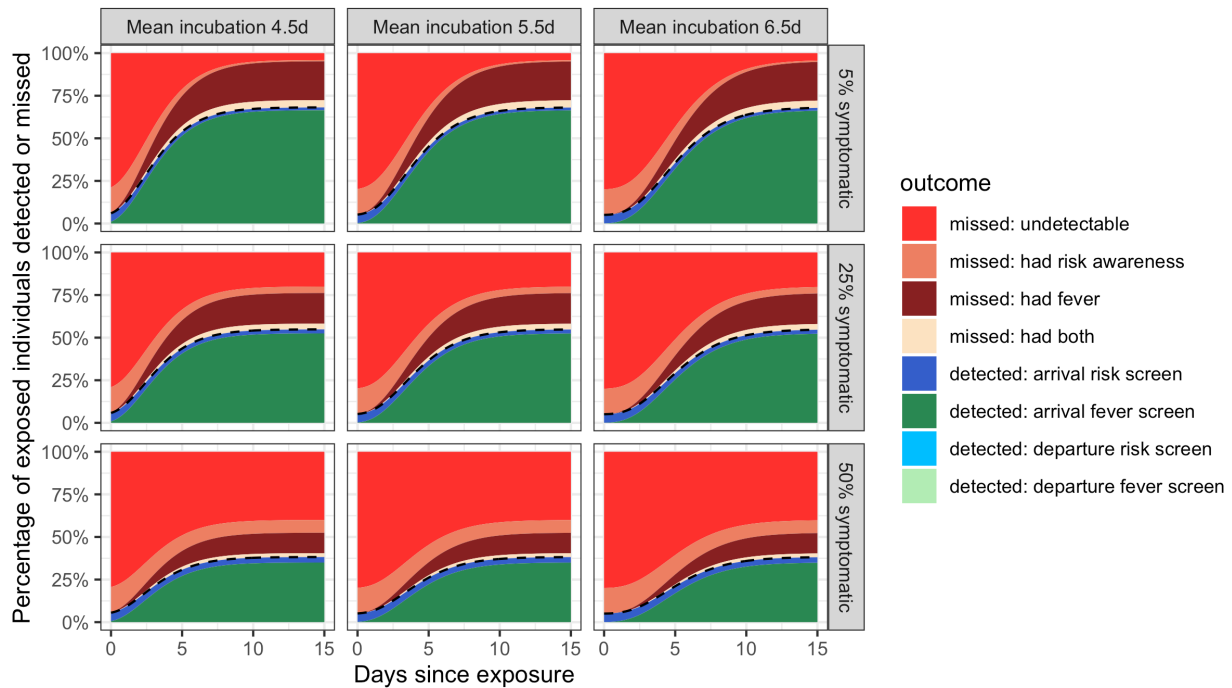

517  
518 Fig 2-Supplementary figure 2. Arrival screening only.

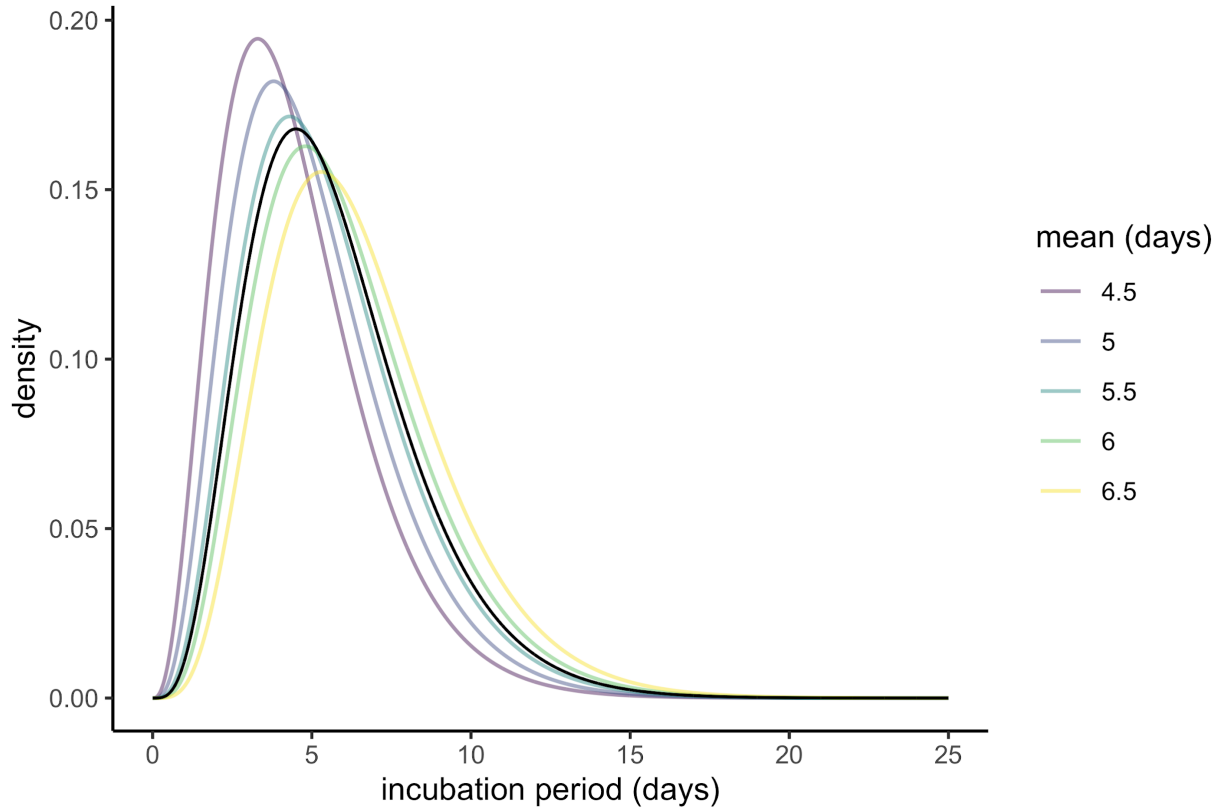

519

520 **Fig 3 - Supplementary figure 1. Plausible incubation period distributions underlying the**  
521 **analyses in Fig. 3.** The black line shows the probability density function of the best-fit gamma  
522 distribution reported by (Backer et al., 2020). Other lines show the probability density functions  
523 for different assumptions regarding the mean incubation period. Each is a gamma distribution  
524 with scale = 1.2, and shape =  $\frac{mean}{1.2}$ .
